# Supplementary material for: Understanding xylose isomerase from Burkholderia cenocepacia: insights into structure and functionality for ethanol production
Source: PubMed Central journal article supplement (PMC6534634; doi:10.1186/s13568-019-0795-4), 2019-05-24
Supplement: 13568_2019_795_MOESM1_ESM.pdf [file 13568_2019_795_MOESM1_ESM.pdf]

**Understanding Xylose Isomerase from *Burkholderia cenocepacia*: insights into structure and functionality for ethanol production**

**Igor P.V. Vieira**<sup>a,1</sup>, Gabrielle T. Cordeiro<sup>a</sup>, Diego E.B. Gomes<sup>b,c,d</sup>, Rafael D. Melani<sup>a</sup>, Leonardo F. Vilela<sup>a</sup>, Gilberto B. Domont<sup>a</sup>, Rafael D. Mesquita<sup>a</sup>, Elis C.A. Eleutherio<sup>a</sup>, Bianca C. Neves<sup>a\*</sup>

<sup>a</sup>Universidade Federal do Rio de Janeiro (UFRJ), Departamento de Bioquímica, Rio de Janeiro, 21.941-909, Brazil.

<sup>b</sup>Institut de Science et d'Ingénierie Supramoléculaires, Université de Strasbourg. 8 allée Gaspard Monge, BP 70028, 67083 Strasbourg Cedex, France.

<sup>c</sup>Diretoria de Metrologia Aplicada às Ciências da Vida - Instituto Nacional de Metrologia, Qualidade e Tecnologia. Duque de Caxias, 25.250-020, Brazil.

<sup>d</sup>CAPES Foundation, Ministry of Education of Brazil, Brasilia, 70.040-020, Brazil.

\*Corresponding author:

Bianca Cruz Neves

Instituto de Química – Universidade Federal do Rio de Janeiro (UFRJ)

Avenida Athos da Silveira Ramos, 149. Centro de Tecnologia, Bloco A, 5º andar, sala 537.

CEP: 21.941-909. Cidade Universitária, Rio de Janeiro, RJ, Brazil.

Tel.: +55 21 3938-7355

Fax.: +55 21 3938-7266

Email address: bcneves@iq.ufrj.br

---

<sup>1</sup>**Igor Patrick Vasconcelos Vieira**

Present address: Molecular Biology Laboratory, Biology Institute, Campus Darcy Ribeiro, Universidade de Brasília, Brasília, DF, Brazil. Zip code: 70910-900.

**Additional Figures**

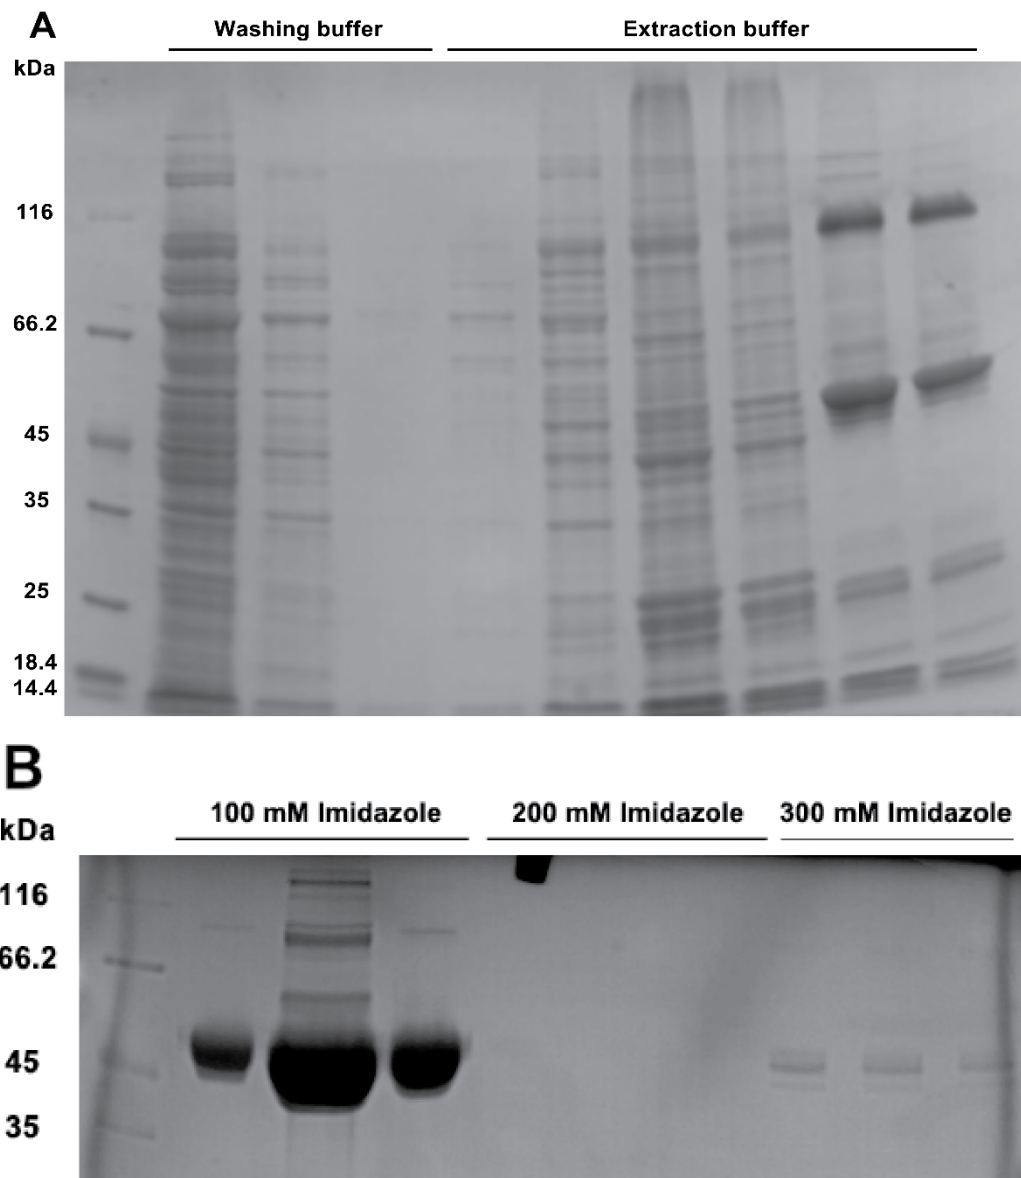

**Figure S1. Protein extraction from *B. cenocepacia*. Only soluble proteins loaded onto the gel.**

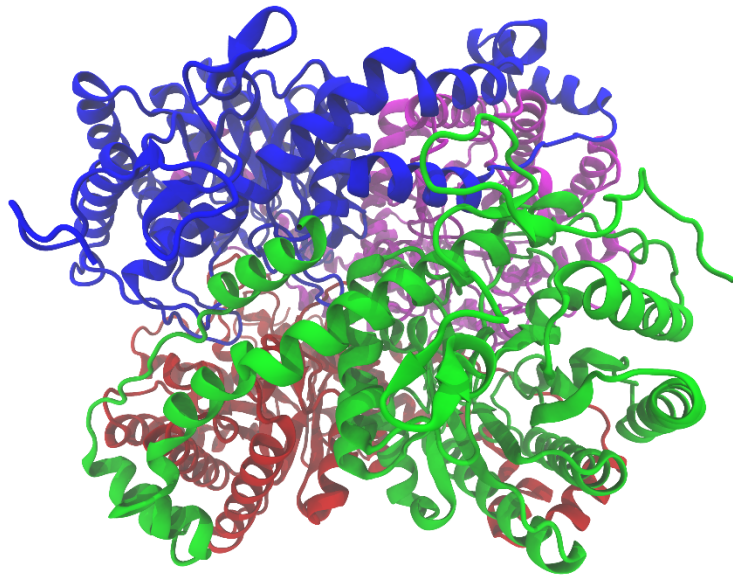

**Figure S2.** XylA predicted structure for *C. phytofermentans*.

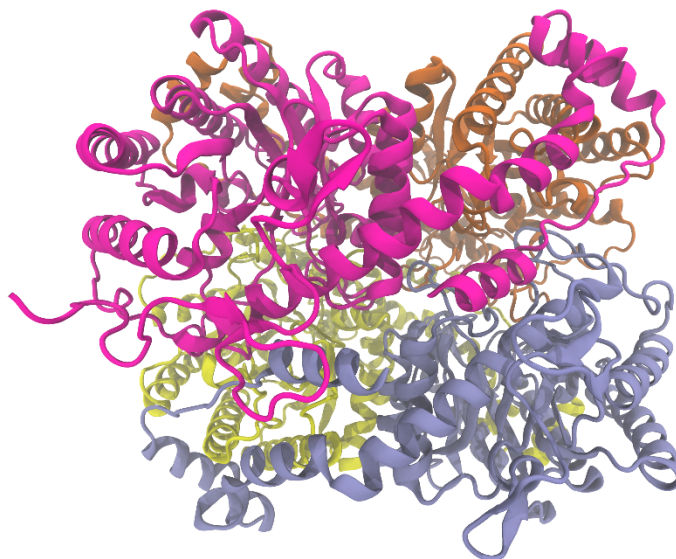

**Figure S3.** XylA predicted structure for *Piromyces sp. E2*.

# Ramachandran Plot

input\_atom\_only

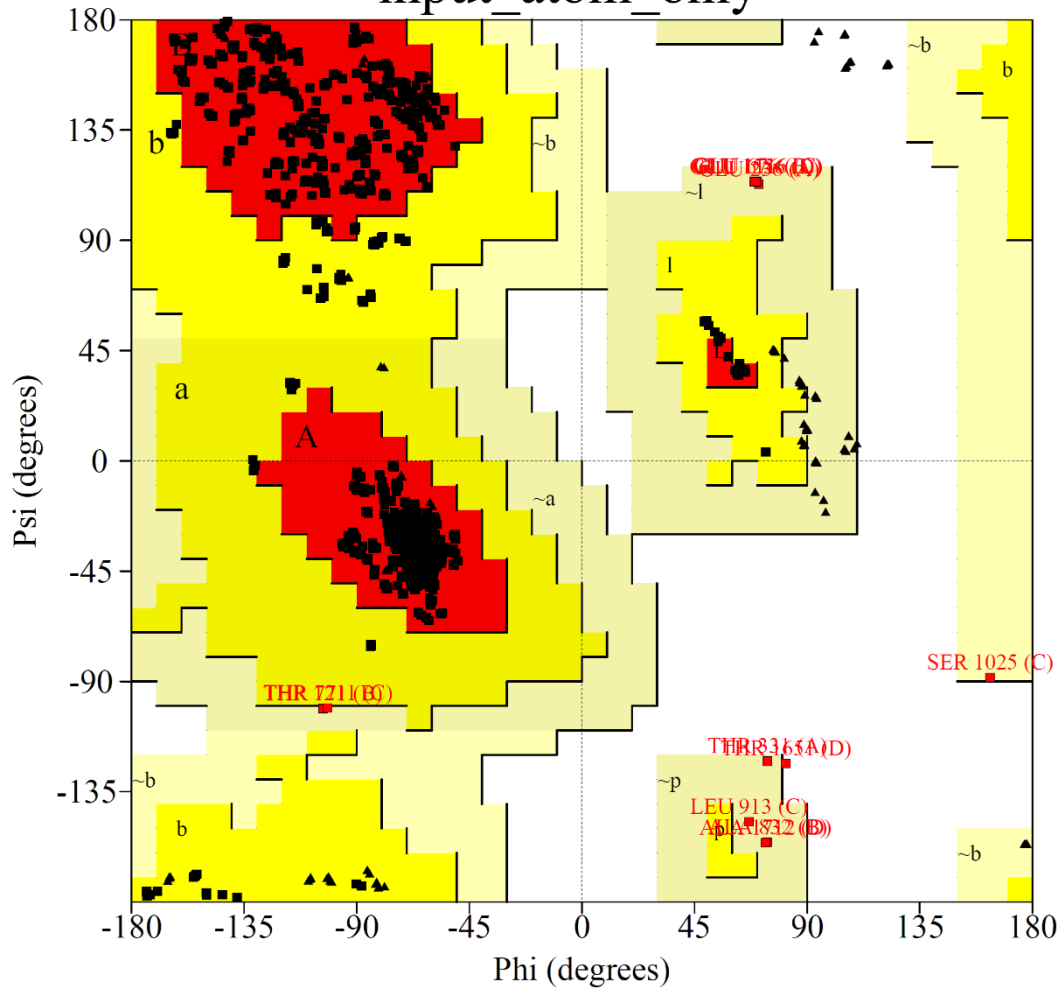

Figure S4. Ramachandran plot of *B. cenocepacia* XI theoretical model.

# Ramachandran Plot

input\_atom\_only

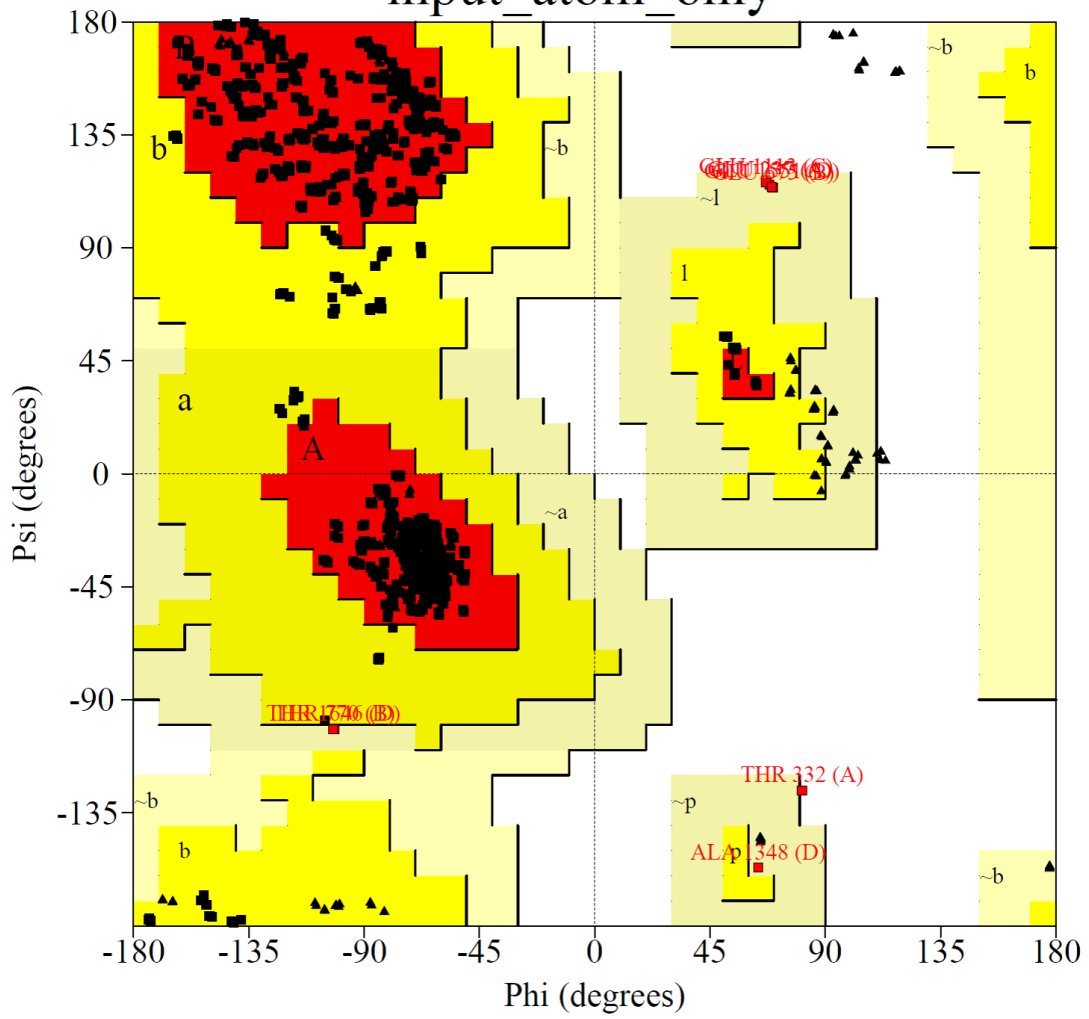

Figure S5. Ramachandran plot of *C. phytofermentans* XI theoretical model.

## Ramachandran Plot

input\_atom\_only

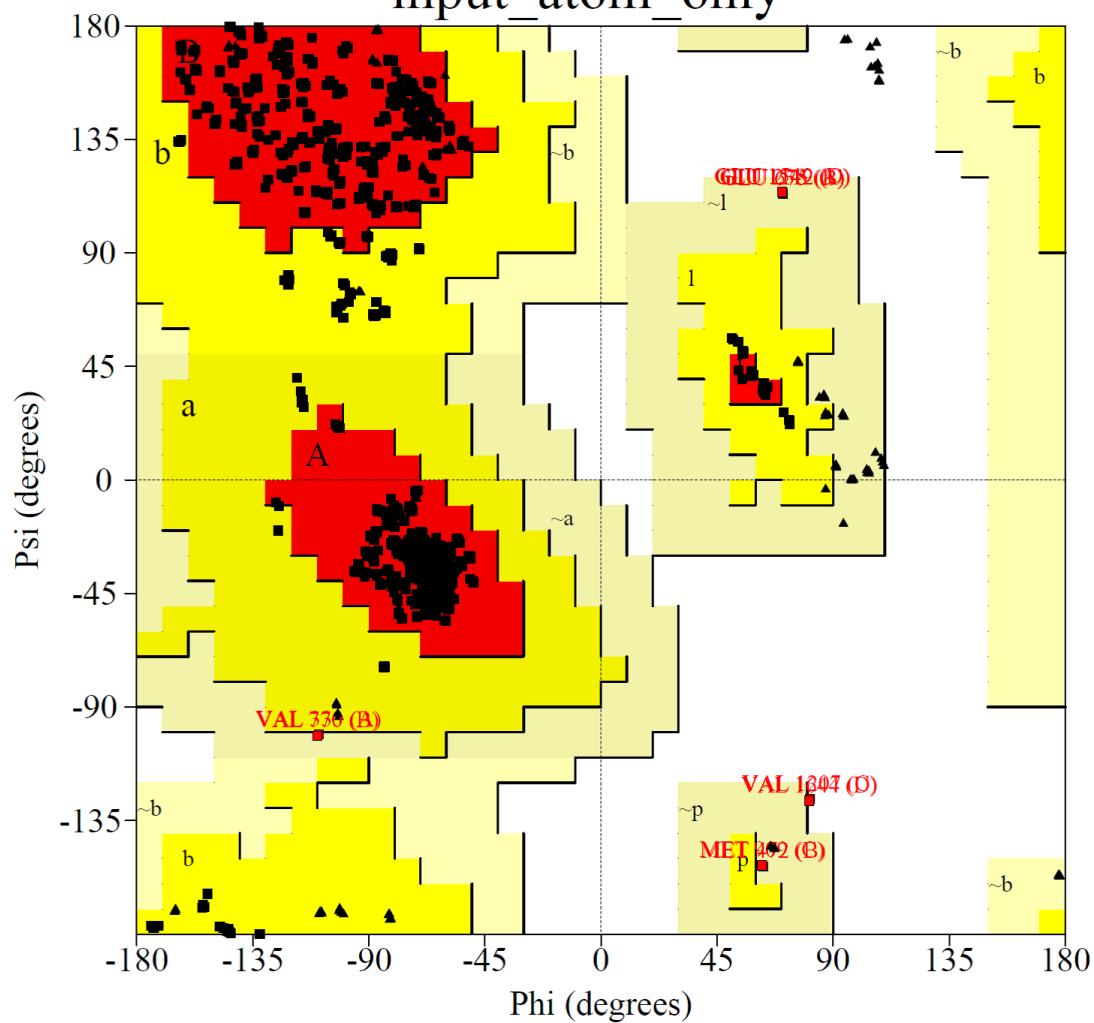

Figure S6. Ramachandran plot of *Piromyces sp. XI* theoretical model.

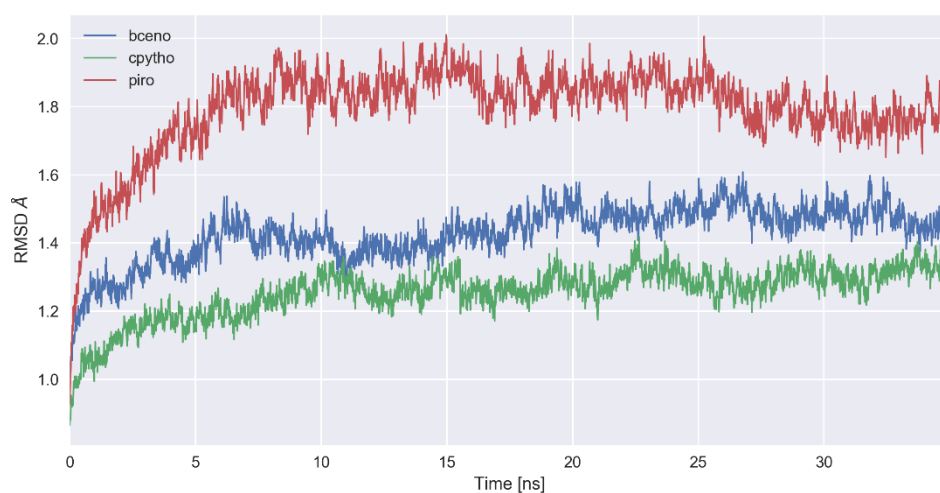

**Figure S7. Global RMSD during dynamics.** Blue: *B. cenocepacia*. Green: *C. phytofermentans*. Red: *Piromyces sp.*

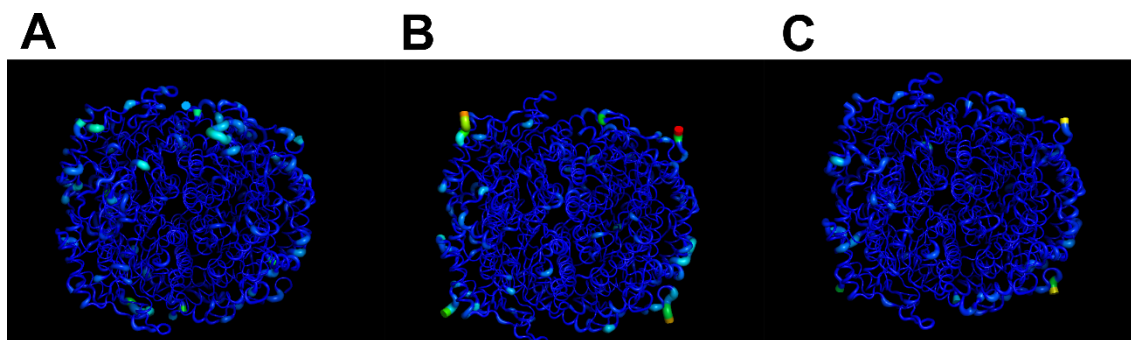

**Figure S8. 3D RMS fluctuation.** A) *B. cenocepacia*. B) *C. phytofermentans*. C) *Piromyces sp.* Structures are in a tube representation where thickness and color represents flexibility. Hot colors represent a higher fluctuation during dynamics simulation.

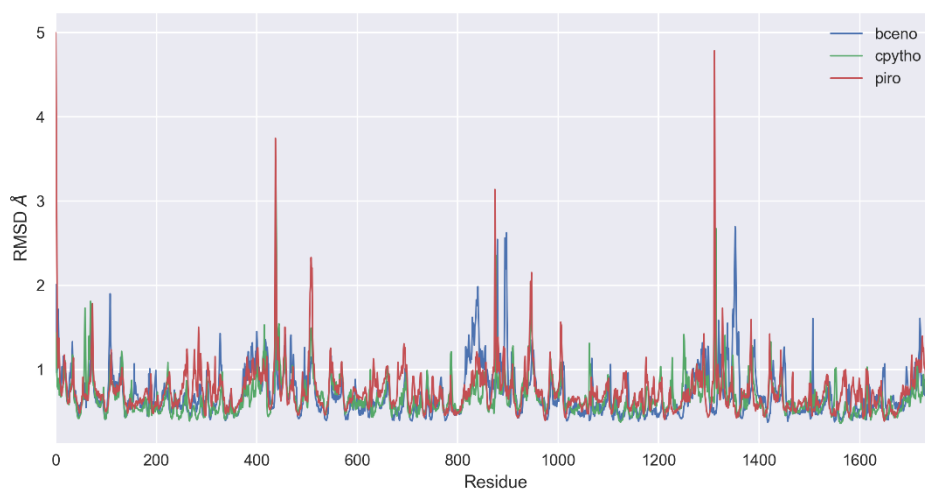

**Figure S9. RMSF variation during dynamics simulation.** Blue: *B. cenocepacia*. Green: *C. phytofermentans*. Red: *Piromyces sp.*

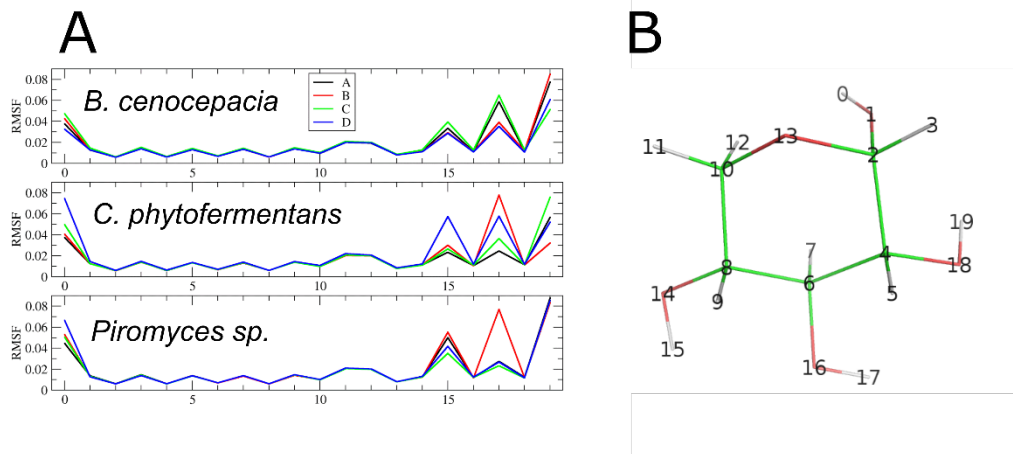

**Figure S10. D-xylose RMSF inside the active site during dynamics simulation.** A) RMSF for each xylose atom. B) D-xylose structure with each atom numbered.

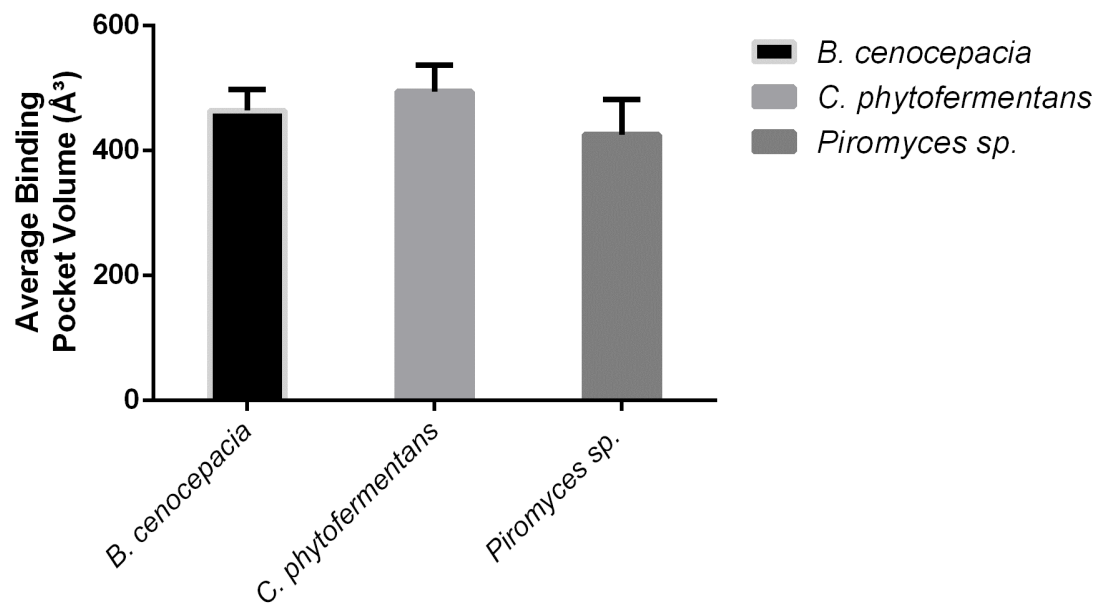

**Figure S11. Binding site pocket volume.** The volume of the protein binding site domain cavity was calculated from the overall average structure resulted from dynamics simulation. The column bars represent the standard error. Data shown are representative of an average of 4 domains from each protein.
